# Supplementary material
Source: PubMed Central journal article supplement (PMC8552113)
Supplement: jamasurg-e215340-s002.pdf [file jamasurg-e215340-s002.pdf]

\*Indicates required information. Only first name, last name, and suffix will appear in PubMed.

| <b>*Group Name(s): PLASTIC collaborators group</b> |                   |                              |                  |                                   |                                          |                                                         |                                                                                            |
|----------------------------------------------------|-------------------|------------------------------|------------------|-----------------------------------|------------------------------------------|---------------------------------------------------------|--------------------------------------------------------------------------------------------|
| <b>*First Name and Middle Initial(s)</b>           | <b>*Last Name</b> | <b>*Suffix (eg, Jr, III)</b> | Academic Degrees | Institution                       | Location (city, state/province, country) | Role or Contribution, eg, chair, principal investigator | Group (if more than 1 Group listed in the byline and/or Subgroup (eg, Steering Committee)) |
| Jessy Joy                                          | van Kleef         |                              | MD               | Amsterdam UMC, location AMC       | Amsterdam                                | investigator                                            | POCOP                                                                                      |
| Mariska                                            | Prins             |                              | MD               | Amsterdam UMC, location AMC       | Amsterdam                                | investigator                                            | POCOP                                                                                      |
| Joyce                                              | Pijpers           |                              | MD               | Amsterdam UMC, location AMC       | Amsterdam                                | investigator                                            | POCOP                                                                                      |
| Jerôme                                             | Profar            |                              | student          | Zuyderland MC                     | Sittard-Geleen                           | investigator                                            |                                                                                            |
| Stan                                               | Tummers           |                              | student          | Zuyderland MC                     | Sittard-Geleen                           | investigator                                            |                                                                                            |
| Kees                                               | de Mooij          |                              | student          | Zuyderland MC                     | Sittard-Geleen                           | investigator                                            |                                                                                            |
| Maaïke                                             | van Dam           |                              |                  | Catharina Hospital                | Eindhoven                                | trial nurse                                             |                                                                                            |
| Monique                                            | Heijmans          |                              |                  | Catharina Hospital                | Eindhoven                                | trial nurse                                             |                                                                                            |
| Antoinette                                         | van Groenestyn    |                              |                  | University Medical Center Utrecht | Utrecht                                  | trial nurse                                             |                                                                                            |
| Edith                                              | Bouwmeester       |                              |                  | Erasmus MC                        | Rotterdam                                | trial nurse                                             |                                                                                            |
| Ilse                                               | Masselink         |                              |                  | ZGT Hospitals                     | Almelo                                   | trial nurse                                             |                                                                                            |
| Damiana                                            | Beumer            |                              |                  | Gelre Hospitals                   | Apeldoorn                                | trial nurse                                             |                                                                                            |
| Nel                                                | de Vries          |                              |                  | Amsterdam UMC, location Vumc      | Amsterdam                                | trial nurse                                             |                                                                                            |
